# Supplementary material
Source: publisher figshare collection journal article supplement (https://gsapubs.figshare.com/ndownloader/files/23318285)
Supplement: Supplementary file 1 [file 23318285]

Cui, H., et al., 2020, Forming sulfate- and REE-rich fluids in the presence of quartz: *Geology*, v. 48, <https://doi.org/10.1130/G46893.1>

## Supplementary material

### *Material and methods*

**Reagents preparation.** Analytical grade solid  $\text{Na}_2\text{SO}_4$  (>99.0%), solid  $\text{Nd}_2(\text{SO}_4)_3 \cdot 8\text{H}_2\text{O}$  (99.9%),  $\text{Na}_2\text{SO}_4 \cdot 10\text{H}_2\text{O}$  (mirabilite), and deionized water were used as starting materials and for preparation of sulfate-saturated solution. Gem-grade quartz crystal from Donghai in eastern China was used. The quartz crystal was crushed and milled in a mortar for 20 minutes to reduce the grain sizes to  $\sim 100 \mu\text{m}$ .

**HDAC apparatus and experiment conduction.** An HDAC (Bassett et al., 1996) was used for the experiments. Two opposed low-fluorescence diamond anvils with 1 mm diameter culets were seated upon a tungsten carbide seat respectively. The anvils were heated by two nickel-chromium heaters wound around the seats to subject the samples to high P-T condition (up to 550 °C). The sample chamber was sealed by compressing the two diamond anvils against a 400  $\mu\text{m}$  diameter hole in the center of a 200  $\mu\text{m}$  thick Re gasket. Temperature inside the sample chamber was measured by two K-type thermocouples attached to each of the diamond anvils, calibrated by measuring the melting points of native sulfur (112 °C) and sodium nitrate (307 °C) (Yuan et al., 2016). Heating rate was controlled at  $< 2 \text{ }^\circ\text{C}/\text{min}$  near phase transitions. Quartz was used as a Raman spectroscopic pressure sensor, with pressure uncertainty of about  $\pm 50 \text{ MPa}$  (Schmidt and Ziemann, 2000).

Sulfate(s) and water were loaded into the sample chamber in four methods: (i) loading  $\text{Na}_2\text{SO}_4$  crystal(s) and then  $\text{Na}_2\text{SO}_4$ -saturated water solution; (ii) loading only mirabilite to quantify the



20  $\text{Na}_2\text{SO}_4/\text{H}_2\text{O}$  ratio; (iii) loading mirabilite and  $\text{Na}_2\text{SO}_4$  piece(s) to get bulk compositions with  
21  $\text{Na}_2\text{SO}_4/\text{H}_2\text{O}$  ratios  $>0.1$ ; and (iv) loading mirabilite and  $\text{Nd}_2(\text{SO}_4)_3 \cdot 8\text{H}_2\text{O}$  to investigate Nd  
22 solubility in sulfate-rich solution. To prevent mirabilite from dehydrate (up to  $32.4^\circ\text{C}$ ), it was  
23 loaded at  $\sim 30^\circ\text{C}$  in a refrigerator. HDAC and Re gaskets were also kept in the refrigerator for at  
24 least 20 minutes before sample loading, to make sure that mirabilite would not “melt” on the warm  
25 anvils.

26 The Re gaskets were one-time use and repeated heating and cooling of the samples was  
27 avoided to minimize reactions between sulfate and Re gasket. The major effect of this reaction is a  
28 decrease in the fluid sulfate concentration. Electronic microscopic observation shows that trace  
29 amounts of Re-sulfide was generated, but can be neglected compared to the very high bulk sulfate  
30 contents of the system. Minor changes in the fluid redox might also happen, but it would not  
31 influence the phase relationships.

32 Gold-lined gaskets were used for experiments with repeating heating and cooling (results  
33 shown in [Fig. 1](#)), to avoid reaction between fluid and Re gaskets. The gold-lined gasket was made  
34 by filling metallic gold in the hole of the Re gasket and then drilling a smaller ( $\sim 300\text{ }\mu\text{m}$  diameter)  
35 hole in the center.

36 The phase diagram of [Figure 1](#) was constituted by results of five runs of experiments with the  
37 same bulk  $\text{Na}_2\text{SO}_4/\text{H}_2\text{O}$  ratio. One run of the experiments was carried using gold-line gasket while  
38 others using common Re gasket. The phase diagram shows consistent P- and T-dependences of  
39 phase boundaries, suggesting that the bulk compositions of the five runs remained nearly identical  
40 and unchanged during heating, i.e., limited degree of fluid-Re reaction.

41 After the experiments of the silica-bearing systems, a pair of new diamond anvils was used for



the quartz-absent “blank control” experiments (Fig. DR2). The anvils were carefully washed in HF solution (10 wt.%) to avoid any contamination by silica.

**Raman spectra acquisition and processing.** The Raman spectra were acquired using a HORIBA Jobin Yvon confocal LabRAM HR Evolution micro-Raman system installed at Peking University. The system is equipped with a frequency doubled Nd:YAG green laser (532.06 nm), a 20× long-working distance objective with 0.25 numerical aperture, and a stigmatic 800 mm spectrometer with a 1800 groove/mm grating. The laser power was 100 mW at the source. The confocal hole was set at 500 μm and the corresponding spectral resolution was  $\pm 0.7 \text{ cm}^{-1}$ . During the experiments, Raman spectra between 100 and 1300  $\text{cm}^{-1}$  were recorded, with a continuing time of 10 and 15 seconds for sodium sulfate and quartz, respectively.

An external light source generated by a Philips 8-watt fluorescent lamp was used as a standard (at 1463  $\text{cm}^{-1}$  for the 532.06 nm laser) to calibrate the spectroscopy drift during the experiments (Yuan et al., 2016). The spectra of the fluorescent lamp were collected after the acquisitions of each quartz spectra (Lu et al., 2007; Scott et al., 2004). The calibrated Raman positions ( $\nu_{\text{corr}}$ ) of quartz were calculated from Raman band value ( $\nu_{\text{measured}}$ ) using the following relationship:

$$\nu_{\text{corr}} (\text{cm}^{-1}) = \nu_{\text{measured}} - \nu_l + \nu_{l, \text{standard}}$$

where  $\nu_{\text{measured}}$  denotes the measured Raman position of quartz, and  $\nu_l$  is the position of lamp fluorescence collected after each quartz spectra, and  $\nu_{l, \text{standard}}$  is that of lamp fluorescence that was collected at the beginning of each run of HDAC experiment. The Peakfit 4.0 package of the SYSTAT Software Inc. was used to process the Raman spectra. The peaks of sodium sulfate, quartz and fluorescent lamp were all fitted with Pearson IV amplify functions because of the asymmetric properties of those peaks (Yuan and Mayanovic, 2017).



63       **Scanning electron microscopic observation.** Quenched sulfate melt attached to the Re gasket  
64       was collected after the HDAC experiment and coated with gold. The sulfate was observed and  
65       compositionally analyzed using the Phenom XL benchtop scanning electron microscope with an  
66       accelerating potential of 15 kV at the Civil and Resource Engineering School of University of Science  
67       and Technology Beijing.

68       **Thermodynamic modeling.** The thermodynamic modeling was carried out using the HCh  
69       program (Bastrakov, 1999). Activity coefficients for charged aqueous species were calculated using  
70       the b-dot equation (Bastrakov, 1999; Helgeson and Kirkham, 1974), and those for neutral species  
71       were unit. The simulations were performed by calculating the full speciation of solutions that are  
72       saturated in fluorite, fluorapatite, calcite, and monazite-(Nd) and contains 5 molal of dissolved CO<sub>2</sub>,  
73       2 molal of NaCl, and 2 molal of Na<sub>2</sub>SO<sub>4</sub> from 300 to 500 °C at 150 MPa. In the quartz-absent  
74       simulation, solid Na<sub>2</sub>SO<sub>4</sub>(s) and Nd<sub>2</sub>(SO<sub>4</sub>)<sub>3</sub>(s) are included in the model, and therefore the  
75       retrograde solubility can be reproduced via the precipitation of the solids at high temperatures.

76       The interaction between silica and sulfate ion cannot be directly simulated due to the lack of  
77       available thermodynamic data. The immediate consequence of the presence of quartz is an  
78       elevation in the solubility of sulfate salts, and the quartz-saturated experiment (Fig. 2) shows that  
79       the high-temperature (300 to 500 °C) solubility of Na<sub>2</sub>SO<sub>4</sub>(s) and Nd<sub>2</sub>(SO<sub>4</sub>)<sub>3</sub>(s) are much higher  
80       than the concentrations of dissolved sulfate (2 molal) and Nd (up to ~50 ppm), although the  
81       experiment is not quantitative. Therefore, the elevated sulfate solubility in the presence of quartz  
82       can be simulated simply by removing sulfate solids from the system and sulfate in the system was  
83       thus forced to be fluid-borne through the whole temperature range. This simple approach cannot  
84       precisely reproduce the silica-sulfate interaction but can simulate the elevated sulfate



concentration, which has the first-order control in the hydrothermal speciation and mobility of REE(III). Thermodynamic properties used in the simulation are listed in [Table DR2](#).

## ***Experimental details***

**Confirmation of sulfate melting by optical observation.** In some cases, especially at the beginning stages of melting, the molten sulfate can hardly be distinguished from sulfate solid by the appearance. In these scenarios, the phenomenon that two sulfate melt droplets merges into a single bigger drop ([Fig. DR3](#)) provide a solid evidence for the liquid state of the sulfate.

**Confirmation of incipient melting of sulfate.** The coupling between incipient melting and the transition from Type III to I polymorphs is evidenced by the presence of amorphous sulfate in samples that was quenched shortly after the solid-solid phase transition ([Fig. DR4](#)). The quenching was done in a dry state, as described in the main text.

**Confirmation of the equilibrium of the experimental system.** To evaluate whether the phase relationship shown in [Figure 1](#) is stable or metastable, one run of experiment using gold-lined gasket and mirabilite and quartz as starting materials was carried out and the heating and cooling cycle was repeated three times. Upon heating, the reproducibility of the measured solidus and total homogenization temperature is within  $\pm 2$  °C. We therefore conclude that the phase boundaries determined during heating represent stable assemblages. Metastable assemblages (supercooling) occur over a narrow temperature range during cooling. For example, the homogenization temperatures obtained during the three runs of cooling (i.e., exsolution of the melt) are in overall  $\sim 20$  °C lower than that determined during heating.



107

108   **REFERENCES CITED**

109   Akinfiev, N., 1998, Speciation and mineral equilibria in the mixed natural fluids H<sub>2</sub>O-non polar gas:

110           Mineralogical Magazine, v. 62, no. 1, p. 25–26.

111   Bassett, W. A., Wu, T. C., Chou, I. M., Jr Haselton, H. T., Frantz, J. D., Mysen, B. O., Huang, W. L.,

112           Sharma, S. K., and Schifer, L. D., 1996, The hydrothermal diamond anvil cell (HyDAC) and

113           its applications: Special Publication: Geochemical Society, v. 5, p. 261–272.

114   Bastrakov, E. N., 1999, HCh: a software package for geochemical equilibrium modelling. User's guide.

115   Berman, R. G., 1988, Internally-consistent thermodynamic data for minerals in the system

116           Na<sub>2</sub>O-K<sub>2</sub>O-CaO-MgO-FeO-Fe<sub>2</sub>O<sub>3</sub>-Al<sub>2</sub>O<sub>3</sub>-SiO<sub>2</sub>-TiO<sub>2</sub>-H<sub>2</sub>O-CO<sub>2</sub>: Journal of Petrology, v. 29, no.

117           2, p. 445–522.

118   Haas, J. R., Shock, E. L., and Sassani, D. C., 1995, Rare earth elements in hydrothermal systems:

119           Estimates of standard partial molal thermodynamic properties of aqueous complexes of the

120           rare earth elements at high pressures and temperatures: Geochimica et Cosmochimica Acta, v.

121           59, no. 21, p. 4329–4350.

122   Helgeson, H. C., and Kirkham, D. H., 1974, Theoretical prediction of the thermodynamic behavior of

123           aqueous electrolytes at high pressures and temperatures; II, Debye-Huckel parameters for

124           activity coefficients and relative partial molal properties: American Journal of Science, v. 274,

125           no. 10, p. 53.

126   Johnson, J. W., Oelkers, E. H., and Helgeson, H. C., 1992, SUPCRT92: A software package for

127           calculating the standard molal thermodynamic properties of minerals, gases, aqueous species,

128           and reactions from 1 to 5000 bars and 0 to 1000 °C, Computers and Geosciences, v. 18, no. 1,



129 p. 899–947.

130 Kestin, J., Sengers, J. V., Kamgarparsi, B., and Sengers, J. M. H. L., 1984, Thermophysical properties  
 131 of fluid D<sub>2</sub>O: *Journal of Physical & Chemical Reference Data*, v. 13, no. 1, p. 175–183.

132 Knacke, O., Kubaschewski, O., and Hesselman, K., 1991, Thermochemical properties of inorganic  
 133 substances, 2nd ed: Springer-Verlag, Berlin, p. 1113.

134 Lu, W. J., Chou, I. M., Burruss, R. C., and Song, Y. C., 2007, A unified equation for calculating  
 135 methane vapor pressures in the CH<sub>4</sub>-H<sub>2</sub>O system with measured Raman shifts: *Geochimica et*  
 136 *Cosmochimica Acta*, v. 71, no. 16, p. 3969–3978.

137 Malinin, A. A., 1983, Study of the dynamic characteristics of thin-walled structures with attached  
 138 weights: *Soviet Applied Mechanics*, v. 19, no. 2, p. 147–149.

139 Marshall, W. L., and Franck, E. U., 1981, Ion product of water substance, 0–1000 °C, 1–10000 bars:  
 140 new international formulation and its background: *Journal of Physical & Chemical Reference*  
 141 *Data*, v. 10, p. 10.

142 Migdisov, A. A., Reukov, V. V., and Williams-Jones, A. E., 2006, A spectrophotometric study of  
 143 neodymium(III) complexation in sulfate solutions at elevated temperatures: *Geochimica et*  
 144 *Cosmochimica Acta*, v. 70, no. 4, p. 983–992.

145 Migdisov, A. A., Williams-Jones, A. E., and Wagner, T., 2009, An experimental study of the solubility  
 146 and speciation of the Rare Earth Elements (III) in fluoride- and chloride-bearing aqueous  
 147 solutions at temperatures up to 300 °C: *Geochimica et Cosmochimica Acta*, v. 73, no. 23, p.  
 148 7087–7109.

149 Murugan, R., Ghule, A., and Chang, H., 2000, Thermo-Raman spectroscopic studies on polymorphism  
 150 in Na<sub>2</sub>SO<sub>4</sub>: *Journal of Physics-Condensed Matter*, v. 12, no. 5, p. 677–700.



151 Plyasunov, A. V., and Shock, E. L., 2001, Correlation strategy for determining the parameters of the  
 152 revised Helgeson-Kirkham-Flowers model for aqueous nonelectrolytes: *Geochimica et*  
 153 *Cosmochimica Acta*, v. 65, no. 21, p. 3879–3900.

154 Pokrovski, G. S., and Dubessy, J., 2015, Stability and abundance of the trisulfur radical ion  $S_3^-$  in  
 155 hydrothermal fluids: *Earth and Planetary Science Letters*, v. 411, p. 298–309.

156 Pokrovski, G. S., Schott, J., and Sergeyev, A. S., 1995, Experimental determination of the stability  
 157 constants of  $NaSO_4^-$  and  $NaB(OH)_4^0$  in hydrothermal solutions using a new high-temperature  
 158 sodium-selective glass electrode – Implications for boron isotopic fractionation: *Chemical*  
 159 *Geology*, v. 124, no. 3, p. 253–265.

160 Pokrovski, V. A., 1998, ETHZ version of SUPCRT.

161 Popa, K., and Konings, R. J. M., 2006, High-temperature heat capacities of  $EuPO_4$  and  $SmPO_4$   
 162 synthetic monazites: *Thermochimica Acta*, v. 445, no. 1, p. 49–52.

163 Robie, R. A., Hemmingway, B. S., and Fisher, J. R., 1979, Thermodynamic properties of minerals and  
 164 related substances at 298.15 K and 1 bar pressure and at higher temperature: US Geological  
 165 Survey Bulletin 1452, US Government Printing Office, Washington, p. 456.

166 Rudolph, W. W., Brooker, M. H., and Tremaine, P. R., 1999, Raman spectroscopy of aqueous  $ZnSO_4$   
 167 solutions under hydrothermal conditions: Solubility, hydrolysis, and sulfate ion pairing:  
 168 *Journal of Solution Chemistry*, v. 28, no. 5, p. 621–630.

169 Schmidt, C., and Ziemann, M. A., 2000, In-situ Raman spectroscopy of quartz: A pressure sensor for  
 170 hydrothermal diamond-anvil cell experiments at elevated temperatures: *American*  
 171 *Mineralogist*, v. 85, no. 11–12, p. 1725–1734.

172 Scott, J. G., Mailis, S., Sones, C. L., and Eason, R. W., 2004, A Raman study of single-crystal



173 congruent lithium niobate following electric-field repoling: *Applied Physics a-Materials*  
174 *Science & Processing*, v. 79, no. 3, p. 691–696.

175 Shock, E. L., and Helgeson, H. C., 1988, Calculation of the thermodynamic and transport properties of  
176 aqueous species at high pressures and temperatures: Correlation algorithms for ionic species  
177 and equation of state predictions to 5 kb and 1000 °C: *Geochimica et Cosmochimica Acta*, v.  
178 52, no. 8, p. 2009–2036.

179 Shock, E. L., Sassani, D. C., Willis, M., and Sverjensky, D. A., 1997, Inorganic species in geologic  
180 fluids: Correlations among standard molal thermodynamic properties of aqueous ions and  
181 hydroxide complexes: *Geochimica et Cosmochimica Acta*, v. 61, no. 5, p. 907–950.

182 Smith, R. M., and Martell, A. E., 1976, *Critical stability constants: inorganic complexes*: New York,  
183 Plenum Press.

184 Sverjensky, D. A., Shock, E. L., and Helgeson, H. C., 1997, Prediction of the thermodynamic  
185 properties of aqueous metal complexes to 1000 °C and 5 kbars: *Geochimica et Cosmochimica*  
186 *Acta*, v. 61, no. 7, p. 1359–1412.

187 Tagirov, B. R., Zotov, A. V., and Akinfiev, N. N., 1997, Experimental study of dissociation of HCl from  
188 350 to 500 °C and from 500 to 2500 bars: Thermodynamic properties of HCl° (aq):  
189 *Geochimica et Cosmochimica Acta*, v. 61, no. 61, p. 4267–4280.

190 Wood, S., Palmer, D., Wesolowski, D., and Bénézech, P., 2002, The aqueous geochemistry of the rare  
191 earth elements and yttrium. Part XI. The solubility of Nd(OH)<sub>3</sub> and hydrolysis of Nd<sup>3+</sup> from  
192 30 to 290 °C at saturated water vapor pressure with in-situ pHm measurement.: *Water-Rock*  
193 *Interactions, Ore Deposits, and Environmental Geochemistry: A Tribute to David A*, v. 7, no.  
194 28, p. 229–256



195 Yuan, X., and Mayanovic, R. A., 2017, An empirical study on Raman peak fitting and its application to  
196 Raman quantitative research: *Applied Spectroscopy*, v. 71, no. 10, p. 2325–2338.

197 Yuan, X. Y., Mayanovic, R. A., and Zheng, H. F., 2016, Determination of pressure from measured  
198 Raman frequency shifts of anhydrite and its application in fluid inclusions and HDAC  
199 experiments: *Geochimica et Cosmochimica Acta*, v. 194, p. 253–265.

200

201



202 **Supplementary figures**

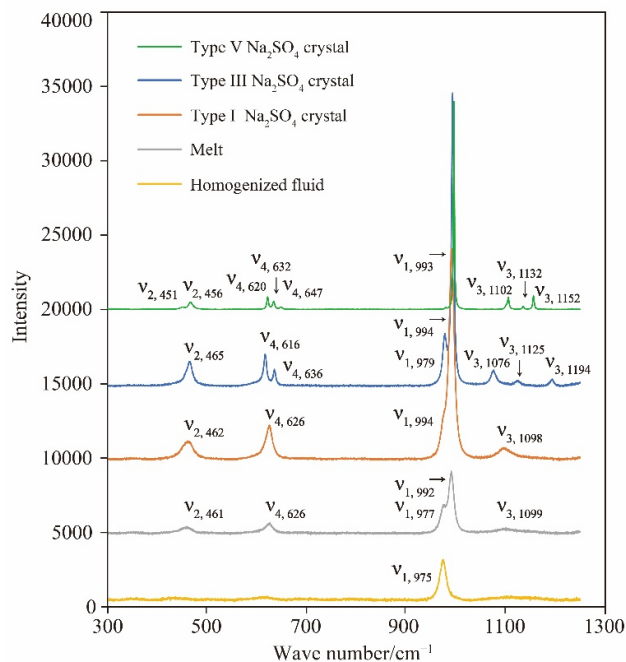

203

204 **Figure DR1. Raman spectroscopy for different sulfate phases.** Three polymorphs of solid Na<sub>2</sub>SO<sub>4</sub> (Type V, III

205 and I) were recognized by Raman spectroscopy (Murugan et al., 2000). Type V crystal is characterized by two

206 sub-peaks of ν<sub>2</sub> located at 451 cm<sup>-1</sup> and 456 cm<sup>-1</sup> and triplet for ν<sub>3</sub> located at 1102 cm<sup>-1</sup>, 1132 cm<sup>-1</sup> and 1152 cm<sup>-1</sup>,

207 respectively. Type III crystal also has a triplet for ν<sub>3</sub>, but the sub-peaks are different from those of Type V. Type I

208 crystal is characterized by a singlet for ν<sub>3</sub> at 1098 cm<sup>-1</sup>. Sulfate melt has weaker and broader peaks compared to the

209 crystal counterparts with subpeaks at 992 and 997 cm<sup>-1</sup>, which are vibrations of monodentate Na<sup>+</sup>-SO<sub>4</sub><sup>2-</sup> ion pair or

210 polymer and free sulfate ion SO<sub>4</sub><sup>2-</sup>, respectively (Rudolph et al., 1999). The spectroscopy for homogenized fluid

211 only has a main peak at 975 cm<sup>-1</sup>, the signal of free SO<sub>4</sub><sup>2-</sup> (Rudolph et al., 1999).

212



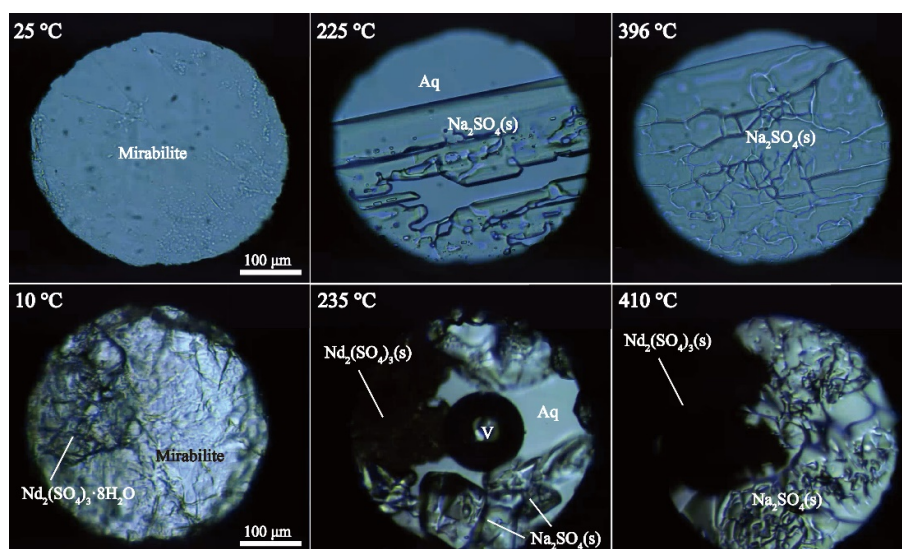

213  
 214 **Figure DR2.** HDAC results of the  $\text{Na}_2\text{SO}_4\text{-H}_2\text{O}$  (top) and  $\text{Na}_2\text{SO}_4\text{-Nd}_2(\text{SO}_4)_3\text{-H}_2\text{O}$  (bottom) systems. In the  
 215 absence of quartz, sulfates are characterized by retrograde solubility. Mirabilite and  $\text{Nd}_2(\text{SO}_4)_3 \cdot 8\text{H}_2\text{O}$  were loaded as  
 216 starting materials.

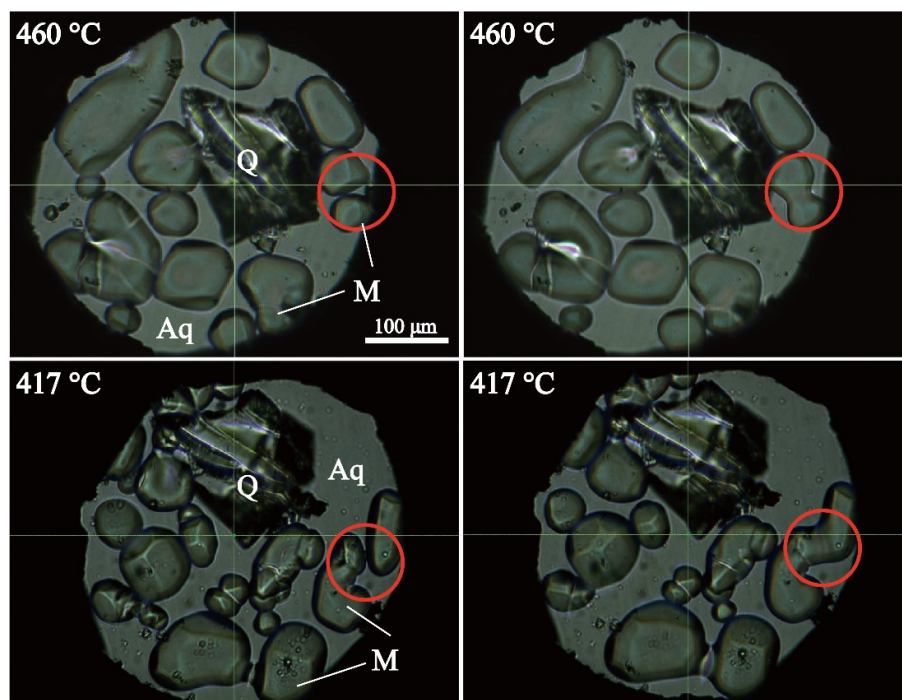

218  
 219 **Figure DR3.** Merging of sulfate droplets observed at 460 and 417 °C, respectively.  $\text{Na}_2\text{SO}_4$  crystal,  
 220  $\text{Na}_2\text{SO}_4$ -saturated solution and quartz were loaded as starting materials.



221

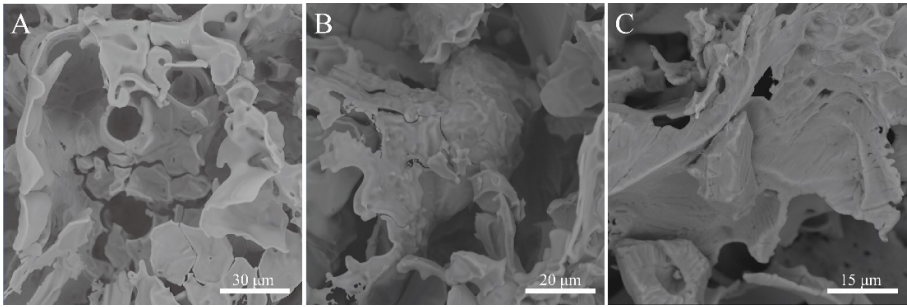

222

223 **Figure DR4. Backscattered electron images of amorphous sulfate from samples that were quenched shortly**  
224 **after the Type III to I phase transition.**

225

226 ***Supplementary table***

227 **Table DR1. Phase transition boundaries determined from three runs of experiments with**  
228 **Na<sub>2</sub>SO<sub>4</sub>/H<sub>2</sub>O molar ratio >0.1. The experiments were conducted using gold-lined Re gaskets.**

|         | Phase III to I (solidus) | Total homogenization |
|---------|--------------------------|----------------------|
| Round 1 | 267 °C, 257 MPa          | 434 °C, 573 MPa      |
| Round 2 | 260 °C, 253 MPa          | 450 °C, 753 MPa      |
| Round 3 | 280 °C, 132 MPa          | 397 °C, 494 MPa      |

229

230

231

232

233

234

235



236 **Table DR2. Solid and aqueous species used in the modeling and sources of thermodynamic**  
 237 **properties.**

| Species                                | Formula/Equation of states            | Reference                                                   |
|----------------------------------------|---------------------------------------|-------------------------------------------------------------|
| <b>Solids</b>                          |                                       |                                                             |
| Fluorite                               | $\text{CaF}_2$                        | <a href="#">Robie et al., 1979</a>                          |
| Calcite                                | $\text{CaCO}_3$                       | <a href="#">Berman, 1988</a>                                |
| Monazite-(Nd)                          | $\text{NdPO}_4$                       | <a href="#">Popa and Konings, 2006</a>                      |
| $\text{Na}_2\text{SO}_4(\text{s})$     | $\text{Na}_2\text{SO}_4$              | <a href="#">Knacke et al., 1991</a>                         |
| $\text{Nd}_2(\text{SO}_4)_3(\text{s})$ | $\text{Nd}_2(\text{SO}_4)_3$          | <a href="#">Knacke et al., 1991</a>                         |
| $\text{NdF}_3(\text{s})$               | $\text{NdF}_3$                        | <a href="#">Knacke et al., 1991</a>                         |
| OH-apatite                             | $\text{Ca}_5(\text{PO}_4)_3\text{OH}$ | <a href="#">Robie et al., 1979</a>                          |
| <b>Aqueous species</b>                 |                                       |                                                             |
| $\text{H}_2\text{O}$                   |                                       | <a href="#">Kestin et al., 1984</a>                         |
| $\text{H}^+$                           |                                       | <a href="#">Marshall and Franck, 1981</a>                   |
| $\text{OH}^-$                          |                                       | <a href="#">Marshall and Franck, 1981</a>                   |
| $\text{H}_2(\text{aq})$                | Revised HKF                           | <a href="#">Johnson et al., 1992</a>                        |
| $\text{O}_2(\text{aq})$                | Revised HKF                           | <a href="#">Johnson et al., 1992</a>                        |
| $\text{CH}_4(\text{aq})$               | Revised HKF                           | HCh build-in (Unitherm) ( <a href="#">Bastrakov, 1999</a> ) |
| $\text{CO}_3^{2-}$                     | Revised HKF                           | <a href="#">Johnson et al., 1992</a>                        |
| $\text{HCO}_3^-$                       | Revised HKF                           | <a href="#">Johnson et al., 1992</a>                        |
| $\text{CO}_2(\text{aq})$               | Revised HKF                           | HCh build-in (Unitherm) ( <a href="#">Bastrakov, 1999</a> ) |
| $\text{PO}_4^{3-}$                     | Revised HKF                           | HCh build-in (Unitherm) ( <a href="#">Bastrakov, 1999</a> ) |



|                                             |             |                                           |
|---------------------------------------------|-------------|-------------------------------------------|
| $\text{H}_2\text{PO}_4^-$                   | Revised HKF | HCh build-in (Unitherm) (Bastrakov, 1999) |
| $\text{HPO}_4^{2-}$                         | Revised HKF | HCh build-in (Unitherm) (Bastrakov, 1999) |
| $\text{H}_3\text{PO}_4(\text{aq})$          | Revised HKF | HCh build-in (Unitherm) (Bastrakov, 1999) |
| $\text{S}_2^{2-}$                           | Revised HKF | Johnson et al., 1992                      |
| $\text{HS}^-$                               | Revised HKF | Shock and Helgeson, 1988                  |
| $\text{H}_2\text{S}(\text{aq})$             | Revised HKF | Plyasunov and Shock, 2001                 |
| $\text{S}_2\text{O}_3^{2-}$                 | Revised HKF | Johnson et al., 1992                      |
| $\text{HS}_2\text{O}_3^-$                   | Revised HKF | Shock et al., 1997                        |
| $\text{H}_2\text{S}_2\text{O}_3(\text{aq})$ | Revised HKF | Shock et al., 1997                        |
| $\text{SO}_2(\text{aq})$                    | Revised HKF | Johnson et al., 1992                      |
| $\text{SO}_3^{2-}$                          | Revised HKF | Johnson et al., 1992                      |
| $\text{HSO}_3^-$                            | Revised HKF | Johnson et al., 1992                      |
| $\text{SO}_4^{2-}$                          | Revised HKF | Johnson et al., 1992                      |
| $\text{HSO}_4^-$                            | Revised HKF | Johnson et al., 1992                      |
| $\text{S}^{3-}$                             | Revised HKF | Pokrovski and Dubessy., 2015              |
| $\text{F}^-$                                | Revised HKF | HCh build-in (Unitherm) (Bastrakov, 1999) |
| $\text{HF}(\text{aq})$                      | Revised HKF | HCh build-in (Unitherm) (Bastrakov, 1999) |
| $\text{HF}_2^-$                             | MRB model   | Malinin 1983                              |
| $\text{Cl}^-$                               | Revised HKF | Shock et al., 1997                        |
| $\text{HCl}(\text{aq})$                     | Revised HKF | Tagirov et al., 1997                      |
| $\text{Na}^+$                               | Revised HKF | Johnson et al., 1992                      |
| $\text{NaOH}(\text{aq})$                    | Revised HKF | SUPCRT95 (Pokrovski, 1998)                |



|                                |             |                                                                     |
|--------------------------------|-------------|---------------------------------------------------------------------|
| NaCl(aq)                       | Revised HKF | <a href="#">Sverjensky et al., 1997</a>                             |
| NaF(aq)                        | Revised HKF | SUPCRT95 ( <a href="#">Pokrovski, 1998</a> )                        |
| NaHS(aq)                       | MRB model   | Calculated from the assumption: $pK(\text{NaHS}) = pK(\text{NaCl})$ |
| $\text{NaCO}_3^-$              | MRB model   | <a href="#">Smith and Martell 1976</a>                              |
| NaHCO <sub>3</sub> (aq)        | MRB model   | <a href="#">Smith and Martell 1976</a>                              |
| $\text{NaSO}_4^-$              | Revised HKF | <a href="#">Pokrovski et al., 1995</a>                              |
| $\text{Ca}^{2+}$               | Revised HKF | HCh build-in (Unitherm) ( <a href="#">Bastrakov, 1999</a> )         |
| $\text{CaOH}^+$                | Revised HKF | <a href="#">Akinfiev 1998</a>                                       |
| $\text{CaF}^+$                 | MRB model   | <a href="#">Malinin 1983</a>                                        |
| $\text{CaCl}^+$                | Revised HKF | SUPCRT95 ( <a href="#">Pokrovski, 1998</a> )                        |
| $\text{CaCl}_2(\text{aq})$     | Revised HKF | SUPCRT95 ( <a href="#">Pokrovski, 1998</a> )                        |
| $\text{CaCO}_3(\text{aq})$     | Revised HKF | SUPCRT95 ( <a href="#">Pokrovski, 1998</a> )                        |
| $\text{Ca}(\text{HCO}_3)^+$    | Revised HKF | <a href="#">Akinfiev 1998</a>                                       |
| $\text{CaSO}_4(\text{aq})$     | Revised HKF | SUPCRT95 ( <a href="#">Pokrovski, 1998</a> )                        |
| $\text{Nd}^{3+}$               | Revised HKF | <a href="#">Shock and Helgeson, 1988</a>                            |
| $\text{NdCO}_3^+$              | Revised HKF | <a href="#">Haas et al., 1995</a>                                   |
| $\text{NdHCO}_3^{2+}$          | Revised HKF | <a href="#">Haas et al., 1995</a>                                   |
| $\text{NdH}_2\text{PO}_4^{2+}$ | Revised HKF | <a href="#">Haas et al., 1995</a>                                   |
| $\text{NdSO}_4^+$              | MRB mode    | <a href="#">Migdisov et al., 2006</a>                               |
| $\text{Nd}(\text{SO}_4)_2^-$   | MRB mode    | <a href="#">Migdisov et al., 2006</a>                               |
| $\text{NdOH}^{2+}$             | MRB mode    | <a href="#">Wood et al., 2002</a>                                   |



|                                     |             |                                       |
|-------------------------------------|-------------|---------------------------------------|
| $\text{Nd}(\text{OH})_2^+$          | MRB mode    | <a href="#">Wood et al., 2002</a>     |
| $\text{Nd}(\text{OH})_3(\text{aq})$ | MRB mode    | <a href="#">Wood et al., 2002</a>     |
| $\text{NdF}^{2+}$                   | Revised HKF | <a href="#">Migdisov et al., 2009</a> |
| $\text{NdCl}^{2+}$                  | Revised HKF | <a href="#">Migdisov et al., 2009</a> |
| $\text{NdCl}_2^+$                   | Revised HKF | <a href="#">Migdisov et al., 2009</a> |



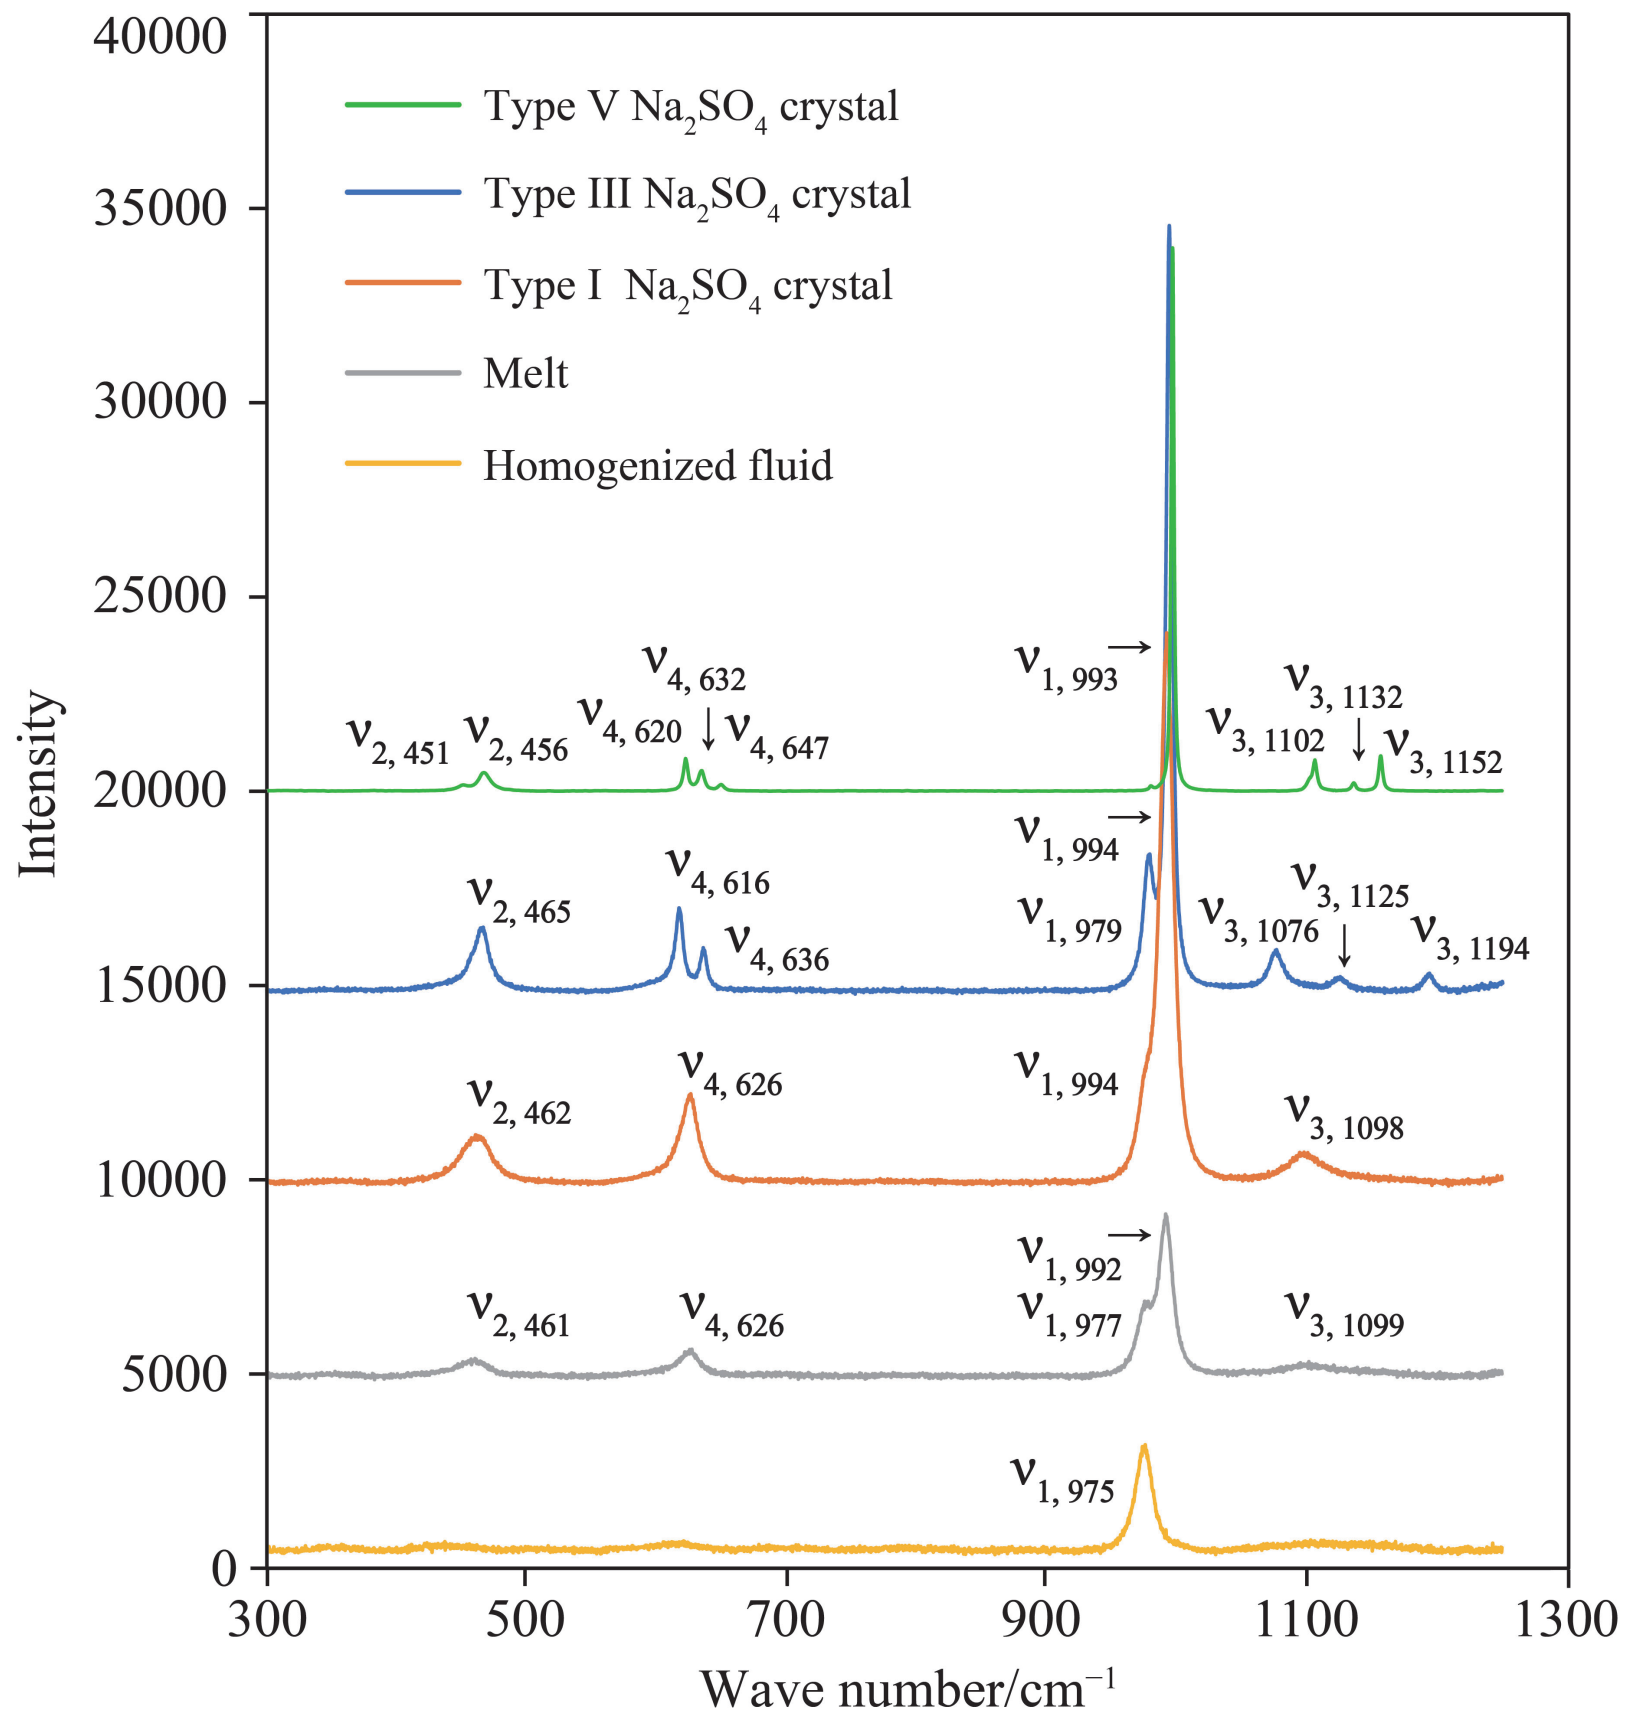

Fig. DR1



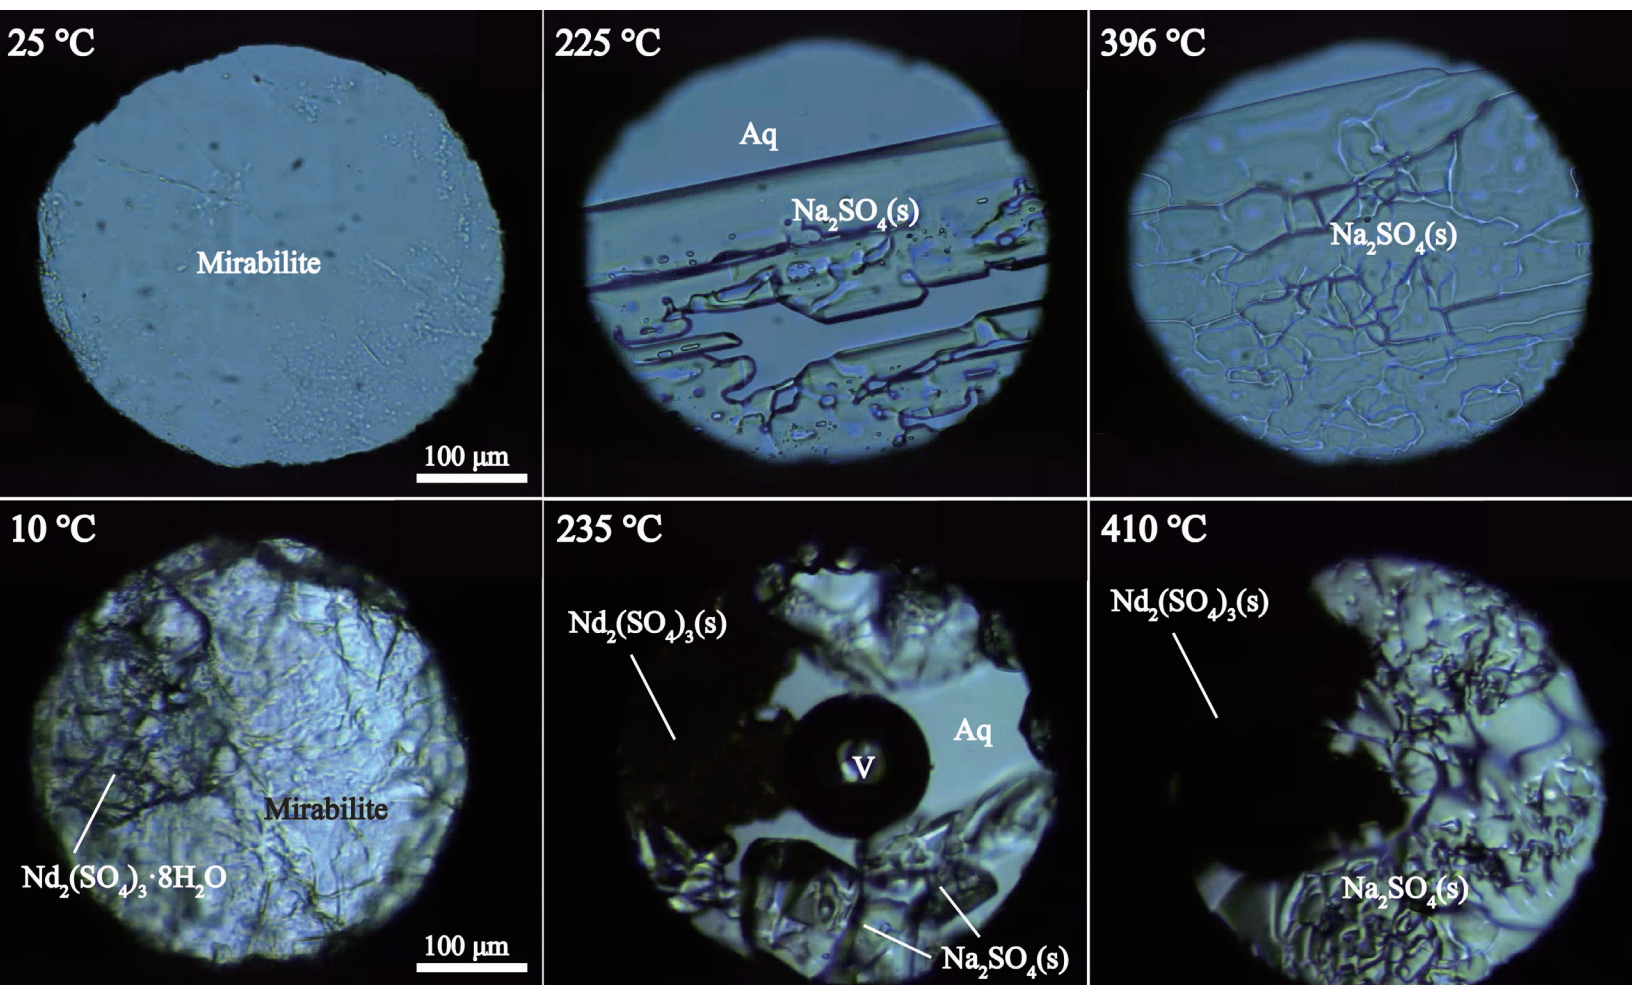

Fig. DR2



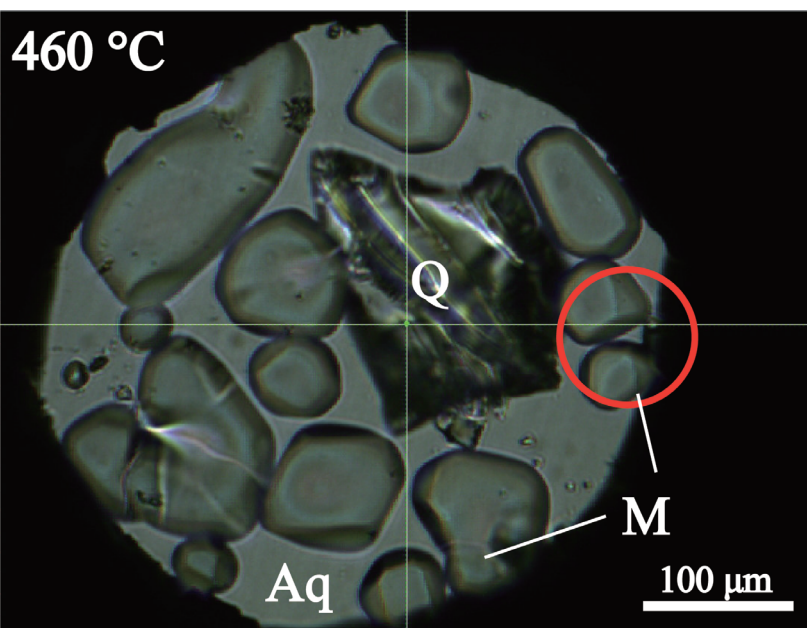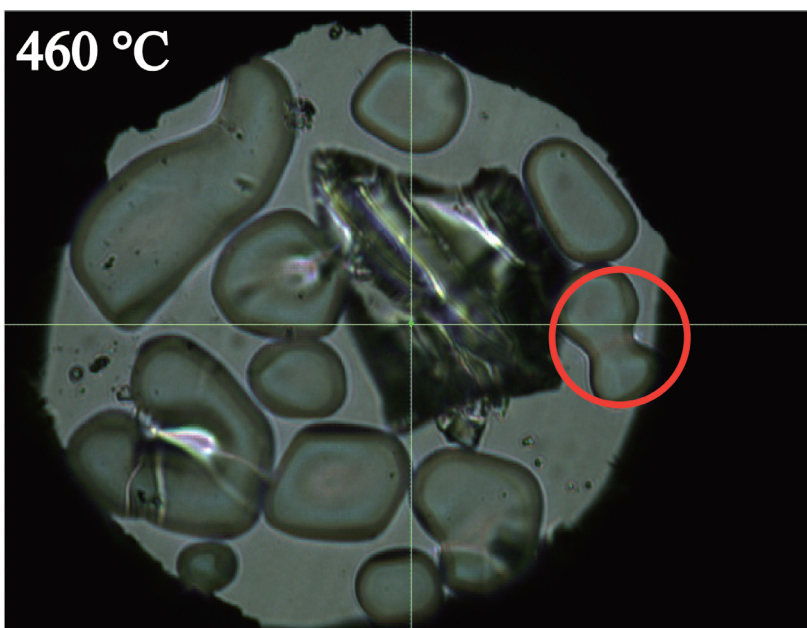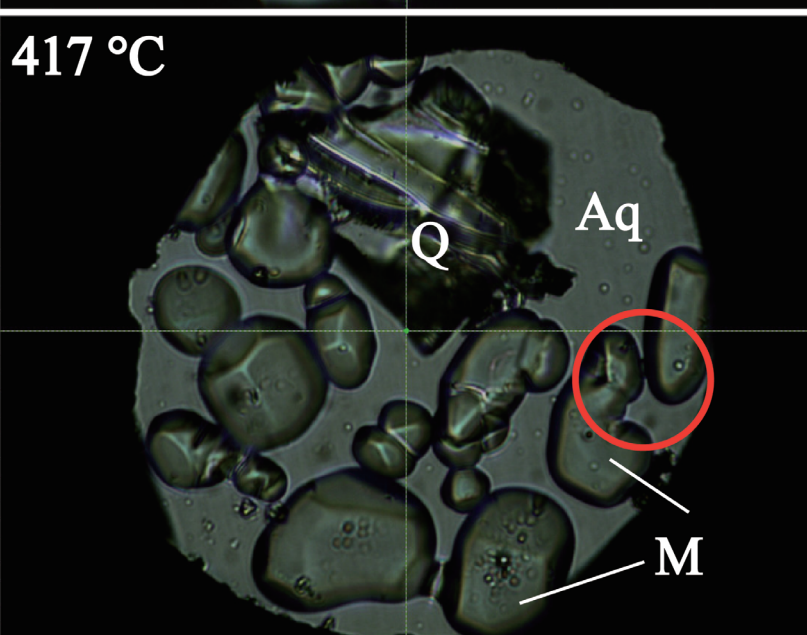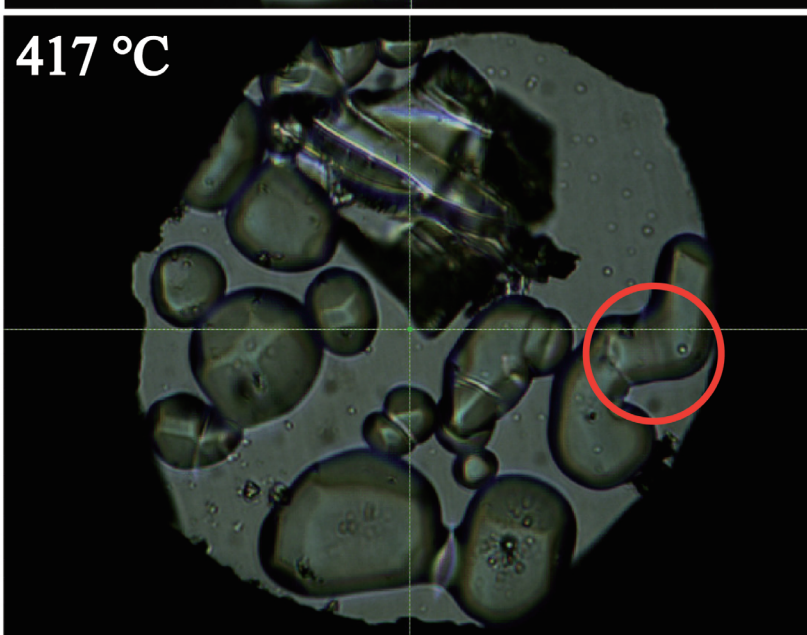

Fig. DR3



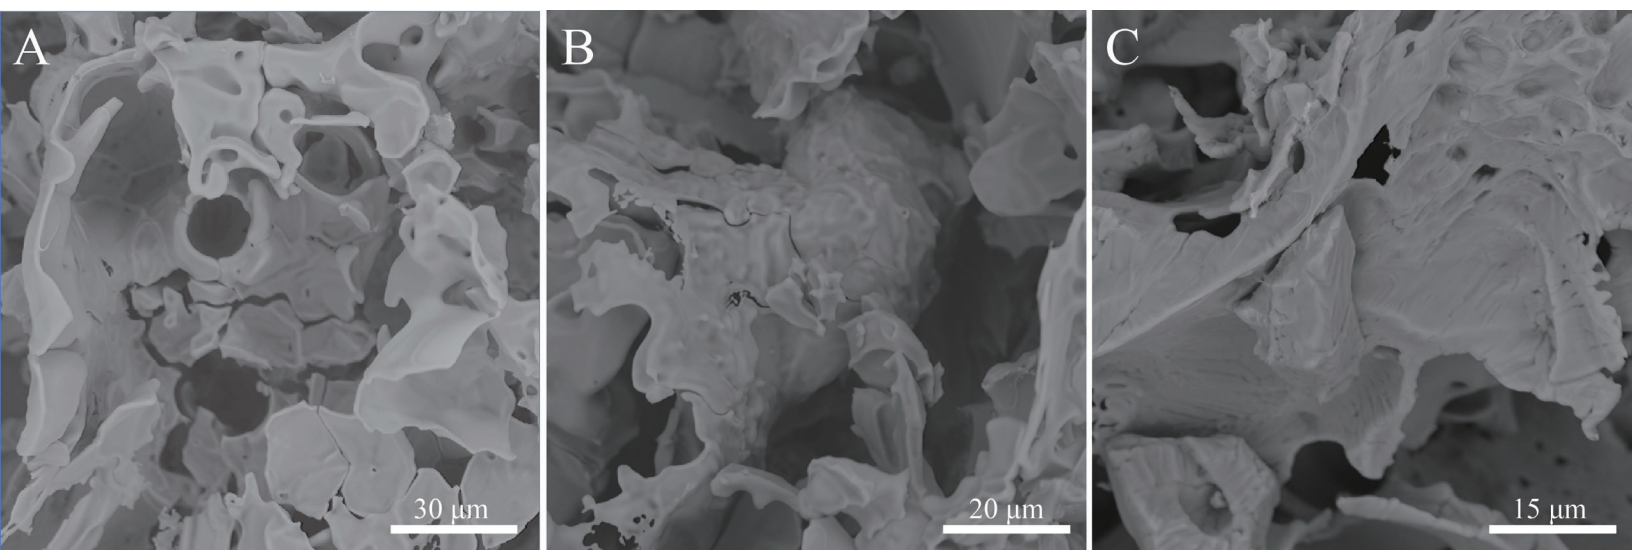

Fig. DR4
